# Supplementary material for: Design, synthesis and evaluation of novel, branched trident small interfering RNA nanostructures for sequence-specific RNAi activity
Source: Royal Society of Chemistry journal article supplement (doi:10.1039/c9ra08071f), 2019-01-01

*Supporting Information*

**Design, synthesis and evaluation of novel, branched trident small  
interfering RNA nanostructures for sequence-specific RNAi activity**

Akash Chandela<sup>a</sup>, Yoshihito Ueno<sup>\*ab</sup>

<sup>a</sup>The United Graduate School of Agricultural Science, Gifu University, 1-1 Yanagido, Gifu  
501-1193, Japan

<sup>b</sup>Course of Applied Life Science, Faculty of Applied Biological Sciences, Gifu University, 1-1  
Yanagido, Gifu 501-1193, Japan

E-mail: uenoy@gifu-u.ac.jp

**Table of Contents**

|                                                                                                                          |                |
|--------------------------------------------------------------------------------------------------------------------------|----------------|
| Experimental procedure of trebling solid-support synthesis.....                                                          | S2-S6          |
| <b>Fig. S1.</b> UPLC chromatogram of branched RNA (crude).....                                                           | S7             |
| <b>Fig. S2.</b> Microscopy images for cellular uptake of treated cells. The fluorescein-labelled siRNA appears as green. | S8             |
| <b>Table S1.</b> List of td RNA sequences.....                                                                           | S9             |
| <b>Table S2.</b> Sequences for DLS characterization.....                                                                 | S9             |
| <b>Table S3.</b> Sequences of siRNAs and td siRNAs with melting temperature values.                                      | S10            |
| <b>Table S4.</b> RNAi activity for modified td siRNAs with sense strand as branching unit.                               | S11            |
| <b>Table S5.</b> RNAi activity for modified td siRNAs with antisense strand as branching unit.                           | S12            |
| <b><sup>1</sup>H and <sup>13</sup>C NMR spectra of compounds.....</b>                                                    | <b>S13-S19</b> |

## Experimental Section

**General.** All solvents and reagents were purchased from the suppliers and used without further purification. Reactions were monitored by TLC on silica plates using UV-light or suitable stain for visualization. Evaporation and condensation were carried out in vacuo.  $\text{CDCl}_3$  (CIL) or  $\text{DMSO-}d_6$  (CIL) were used as solvents for obtaining NMR spectra. NMR spectra were recorded with JEOL JNM-ECS 400 and 500 spectrometers with tetramethylsilane as an internal standard (for  $^{13}\text{C}$  NMR and  $^1\text{H}$  NMR). Chemical shifts ( $\delta$ ) and coupling constants ( $J$ ) are given in ppm (parts per million) and Hz (hertz) respectively. The abbreviations s, d, t, q and m signify singlet, doublet, triplet, quartet, and multiplet respectively.

### Synthesis of solid-support analog.

#### 2-(((*tert*-Butyldimethylsilyloxy)methyl)-2-(hydroxymethyl)propane-1,3-diol (**D2**))

To a solution of pentaerythritol (1.36 g, 10 mmol) and  $\text{Et}_3\text{N}$  (1.54 mL, 11 mmol) in DMF (80 mL) was added TBDMSCl (1.21 g, 8 mmol) and stirred at room temperature. The reaction mixture was stirred for 16 h at room temperature and partitioned between EtOAc and aqueous  $\text{NaHCO}_3$  (saturated). The organic layer was washed with brine, dried ( $\text{Na}_2\text{SO}_4$ ) and evaporated under reduced pressure. The crude was purified by silica gel chromatography using chloroform/methanol (20:1) to yield D2 (1.30 g, 5.2 mmol, 65%).  $^1\text{H-NMR}$  (500 MHz,  $\text{CDCl}_3$ ),  $\delta$  3.72 (d,  $J = 5.7$  Hz, 6H), 3.66 (s, 2H), 2.53 (t,  $J = 5.7$  Hz, 3H), 0.89 (d,  $J = 11.5$  Hz, 9H), 0.08 (d,  $J = 2.9$  Hz, 6H);  $^{13}\text{C-NMR}$  (126 MHz,  $\text{CDCl}_3$ )  $\delta$  77.42, 76.90, 65.89, 64.73, 45.20, 25.93, 18.23, -5.59, HRMS: 273.149  $[\text{M}+\text{Na}]^+$ .

#### (3-(Allyloxy)-2,2-bis((allyloxy)methyl)propoxy)(*tert*-butyl)dimethylsilane (**D3**))

To a stirred solution of NaH, in 60% oil immersion (0.78 g, 19.4 mmol) in THF (50 mL) was added D2 (1.515 g, 4.85 mmol) dissolved in THF (10 mL) at  $0^\circ\text{C}$ . The reaction was stirred at  $0^\circ\text{C}$  for 30 minutes before adding the allyl bromide (2.46 mL, 29.1 mmol). The reaction mixture was then stirred for 14 h at room temperature and traced with TLC using  $\text{KMnO}_4$  as

the stain for the double bond. Excess of NaH was quenched with MeOH and then partitioned between EtOAc and aqueous NaHCO<sub>3</sub> (saturated). The organic layer was washed with brine, dried (Na<sub>2</sub>SO<sub>4</sub>) and evaporated under reduced pressure. The crude was purified by silica gel chromatography using hexane/ethyl acetate (20:1) to yield D3 (1.45 g, 3.92 mmol, 81%). <sup>1</sup>H-NMR (500 MHz, CDCl<sub>3</sub>) δ 5.84-5.92 (m, 3H), 5.25 (dq, *J* = 17.2, 1.7 Hz, 3H), 5.11-5.14 (m, 3H), 3.94 (td, *J* = 3.4, 1.5 Hz, 6H), 3.59 (s, 2H), 3.42 (s, 6H), 0.88 (s, 9H), 0.02 (t, *J* = 3.2 Hz, 6H); <sup>13</sup>C-NMR (126 MHz, CDCl<sub>3</sub>) δ 135.47, 116.18, 77.41, 76.90, 72.42, 69.13, 61.74, 46.20, 29.86, 26.02, 18.38, -5.49, HRMS: 393.240 [M+Na]<sup>+</sup>.

3,3'-((2-(((*tert*-Butyldimethylsilyl)oxy)methyl)-2-((3-hydroxypropoxy)methyl)propane-1,3-diyl)bis(oxy))bis(propan-1-ol) (**D4**)

9- Borabicyclo [3.3.1] nonane (9-BBN, 0.5 M in THF, 33.75 mL) was added dropwise to a solution of compound D3 (1.39 g, 3.75 mmol) in THF (15 mL) and stirred for 17 h at room temperature. Water was added to the reaction mixture until effervescence ceased. 3 N NaOH solution (12.6 mL) was added, and then, slowly 30% aqueous hydrogen peroxide solution (6.4 mL) was added while keeping the temperature between 30 and 50 °C. The mixture was stirred and extracted with water and ethyl acetate. The organic layer was washed with neutral phosphate buffer solution and brine, dried over Na<sub>2</sub>SO<sub>4</sub>, filtered, and concentrated. The crude material was purified by column chromatography (4% methanol in chloroform) to afford the desired product D4 (1.32 g, 3.11 mmol, 83%). <sup>1</sup>H-NMR (500 MHz, CDCl<sub>3</sub>) δ 3.74 (q, *J* = 5.3 Hz, 6H), 3.58 (t, *J* = 5.4 Hz, 6H), 3.50 (d, *J* = 6.3 Hz, 2H), 3.37 (s, 6H), 3.22 (t, *J* = 5.4 Hz, 3H), 1.77-1.82 (m, 6H), 0.88 (s, 10H), 0.03 (s, 6H); <sup>13</sup>C-NMR (126 MHz, CDCl<sub>3</sub>) δ 77.41, 76.90, 70.69, 70.62, 61.92, 61.79, 45.60, 31.86, 25.98, 18.38, 14.33, -5.56, HRMS: 447.273 [M+Na]<sup>+</sup>.

6,6-bis((3-(Allyloxy)propoxy)methyl)-2,2,3,3-tetramethyl-4,8,12-trioxa-3-silapentadec-14-ene (**D5**)

To a stirred solution of NaH, in 60% oil immersion (0.46g, 11.48 mmol) in THF (30 mL) was added D4 (1.22 g, 2.87 mmol) dissolved in THF (6 mL) at 0°C. The reaction was stirred at 0°C for 30 minutes before adding the allyl bromide (1.46 mL, 17.22 mmol). The reaction mixture was then stirred overnight at room temperature and traced with TLC using KMnO<sub>4</sub> as the stain for the double bond. Excess of NaH was quenched with MeOH and then partitioned between EtOAc and aqueous NaHCO<sub>3</sub> (saturated). The organic layer was washed with brine, dried (Na<sub>2</sub>SO<sub>4</sub>) and evaporated under reduced pressure. The crude was purified by silica gel chromatography using hexane/ethyl acetate (10:1) to yield D5 (1.00 g, 1.85 mmol, 64%). <sup>1</sup>H-NMR (500 MHz, CDCl<sub>3</sub>) δ 5.91 (qd, *J* = 11.1, 5.4 Hz, 3H), 5.26 (dq, *J* = 17.2, 1.7 Hz, 3H), 5.16 (dd, *J* = 10.3, 1.1 Hz, 3H), 3.96 (td, *J* = 3.4, 2.1 Hz, 6H), 3.53 (s, 2H), 3.50 (t, *J* = 6.6 Hz, 6H), 3.45 (t, *J* = 6.3 Hz, 6H), 3.34 (s, 6H), 1.80-1.85 (m, 6H), 0.88 (s, 9H), 0.01 (d, *J* = 2.9 Hz, 6H); <sup>13</sup>C-NMR (126 MHz, CDCl<sub>3</sub>) δ 135.17, 116.82, 77.42, 76.90, 72.02, 69.51, 68.38, 67.71, 61.82, 46.18, 30.25, 26.03, 18.40, -5.47, HRMS: 567.372 [M+Na]<sup>+</sup>.

10-(((*tert*-Butyldimethylsilyl)oxy)methyl)-10-((3-(3-hydroxypropoxy)propoxy)methyl)-4,8,12,16-tetraoxanonadecane-1,19-diol (**D6**)

9-Borabicyclo [3.3.1] nonane (9-BBN, 0.5 M in THF, 14.85 mL) was added dropwise to a solution of compound D5 (0.9 g, 1.65 mmol) in THF (10 mL) and stirred for 18 h at room temperature. Water was added to the reaction mixture until effervescence ceased. 3 N NaOH solution (5.6 mL) was added, and then, 30% aqueous hydrogen peroxide solution (6.4 mL) was added carefully, while keeping the temperature between 30 and 50 °C. The mixture was stirred and extracted with water and ethyl acetate. The organic layer was washed with neutral phosphate buffer solution and brine, dried over Na<sub>2</sub>SO<sub>4</sub>, filtered, and concentrated. The crude was purified by column chromatography (4% methanol in chloroform) to afford the desired product D6 (0.92 g, 1.53 mmol, 93%). <sup>1</sup>H-NMR (500 MHz, CDCl<sub>3</sub>) δ 3.76 (q, *J* = 5.5 Hz, 6H),

3.60 (t,  $J = 5.7$  Hz, 6H), 3.49-3.52 (m, 8H), 3.44 (t,  $J = 6.3$  Hz, 6H), 3.33 (s, 6H), 2.61 (t,  $J = 5.4$  Hz, 3H), 1.81 (td,  $J = 12.7, 6.3$  Hz, 12H), 0.88 (s, 9H), 0.02 (d,  $J = 2.9$  Hz, 6H);  $^{13}\text{C}$ -NMR (126 MHz,  $\text{CDCl}_3$ )  $\delta$  77.42, 76.90, 70.24, 69.47, 68.53, 68.25, 62.06, 61.74, 46.17, 32.18, 30.14, 26.02, 18.40, -5.48, HRMS: 621.404  $[\text{M}+\text{Na}]^+$ .

12,12-bis((3-(3-(bis(4-methoxyphenyl)(phenyl)methoxy)propoxy)propoxy)methyl)-1,1-bis(4-methoxyphenyl)-15,15,16,16-tetramethyl-1-phenyl-2,6,10,14-tetraoxa-15-silahepta- decane (**D7**)

To a solution of D6 (0.84 g, 1.40 mmol) in pyridine (30 mL) stirred at room temperature, DMTrCl (1.71 g, 5.04 mmol) was added. The mixture was stirred for 12 h and extracted with EtOAc and aqueous  $\text{NaHCO}_3$  (saturated). The organic layer was washed with brine, dried ( $\text{Na}_2\text{SO}_4$ ) and concentrated under vacuum. The residue was purified by silica gel chromatography using hexane/ethyl acetate (5:1) to give D7 (1.90 g, 1.26 mmol, 90%):  $^1\text{H}$ -NMR (500 MHz,  $\text{CDCl}_3$ ) 7.42 (d,  $J = 7.4$  Hz, 6H), 7.29-7.32 (m, 13H), 7.28 (s, 2H), 7.25 (s, 2H), 7.18 (t,  $J = 7.2$  Hz, 3H), 6.79-6.81 (m, 13H), 3.77 (s, 18H), 3.53 (t,  $J = 6.0$  Hz, 8H), 3.43 (t,  $J = 6.6$  Hz, 6H), 3.38 (t,  $J = 6.3$  Hz, 6H), 3.30 (s, 6H), 3.12 (t,  $J = 6.3$  Hz, 6H), 1.73-1.87 (m, 12H), 0.86 (s, 9H), -0.01 (s, 6H);  $^{13}\text{C}$ -NMR (126 MHz,  $\text{CDCl}_3$ )  $\delta$  158.46, 145.44, 136.76, 130.15, 128.34, 127.82, 126.71, 113.10, 85.86, 77.42, 76.91, 69.45, 68.53, 68.30, 60.53, 60.47, 55.31, 30.60, 30.25, 26.03, 21.20, 14.35, -5.46, HRMS: 1527.807  $[\text{M}+\text{Na}]^+$ .

3-(3-(3-(bis(4-Methoxyphenyl)(phenyl)methoxy)propoxy)propoxy)-2,2-bis((3-(3-(bis(4-methoxyphenyl)(phenyl)methoxy)propoxy)propoxy)methyl)propan-1-ol (**D8**)

To a stirred solution of D7 (1.81 g, 1.19 mmol) in THF (12 mL) was added TBAF (1 M in THF, 2.38 mL) at room temperature. The reaction mixture was stirred for 18 h at room temperature and partitioned between EtOAc and aqueous  $\text{NaHCO}_3$  (saturated). The organic layer was washed with brine, dried ( $\text{Na}_2\text{SO}_4$ ) and evaporated under reduced pressure. The crude

was purified by silica gel chromatography using hexane/ethyl acetate (2:1) to yield D8 (1.50 g, 1.08 mmol, 91%). <sup>1</sup>H-NMR (500 MHz, CDCl<sub>3</sub>) δ 7.41-7.43 (m, 6H), 7.29-7.32 (m, 13H), 7.28 (s, 2H), 7.25 (s, 2H), 7.18 (t, *J* = 7.2 Hz, 3H), 6.79-6.82 (m, 13H), 3.77 (s, 18H), 3.65 (d, *J* = 6.3 Hz, 2H), 3.53 (t, *J* = 6.6 Hz, 6H), 3.44 (s, 1H), 3.42 (t, *J* = 5.7 Hz, 9H), 3.39 (s, 2H), 3.39 (s, 6H), 3.12 (t, *J* = 6.3 Hz, 6H), 3.00 (t, *J* = 6.3 Hz, 1H), 1.82-1.87 (m, 6H), 1.74-1.79 (m, 6H); <sup>13</sup>C-NMR (126 MHz, CDCl<sub>3</sub>) δ 158.46, 145.43, 136.74, 130.15, 128.32, 127.82, 126.72, 113.10, 85.86, 77.41, 76.90, 71.59, 68.84, 68.34, 68.04, 60.43, 55.32, 44.91, 30.55, 30.11, HRMS: 1413.743 [M+Na]<sup>+</sup>.

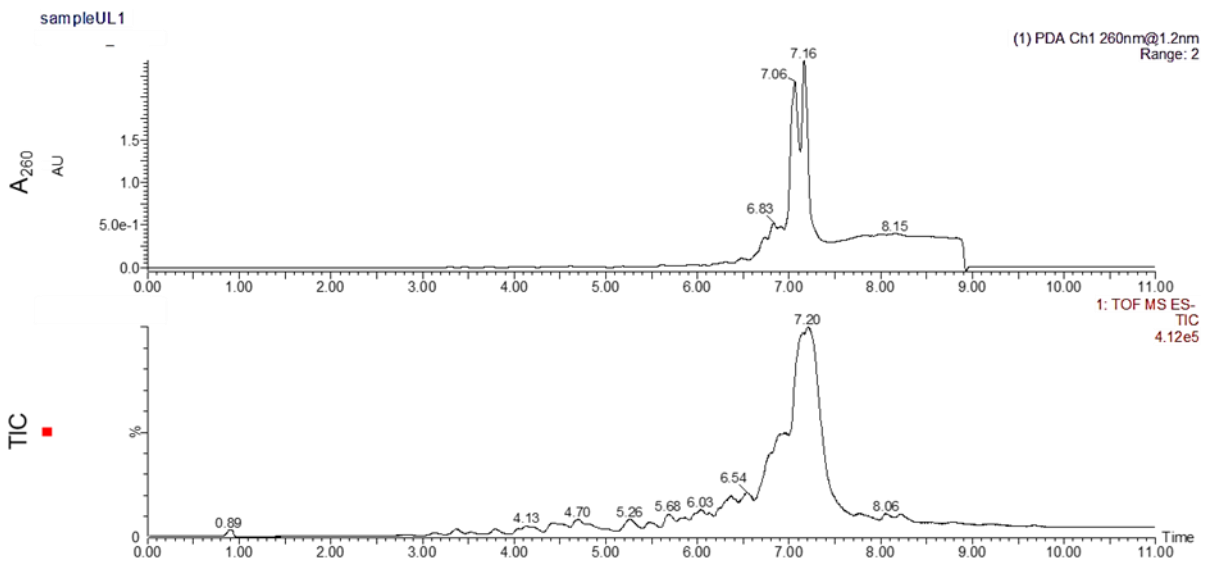

**Fig. S2.** UPLC chromatogram of branched RNA (crude).

**Cellular Uptake Test.** HeLa cells ( $4.0 \times 10^4$  cell/mL) were cultured on the 48-micro well plate (400  $\mu$ L/well) and were grown for 24 h before transfection. Cells were transfected with 50 nM of fluorescein labelled siRNA and equimolar td siRNA in serum-free OptiMEM medium. Transfection of these siRNAs was accomplished using the RNAimax lipofectamine. After 3 h of transfection, cells were washed by PBS, and the accumulations of fluorescein-labelled siRNAs in the transfected cells were visualized by confocal microscope (Zeiss LSM710).

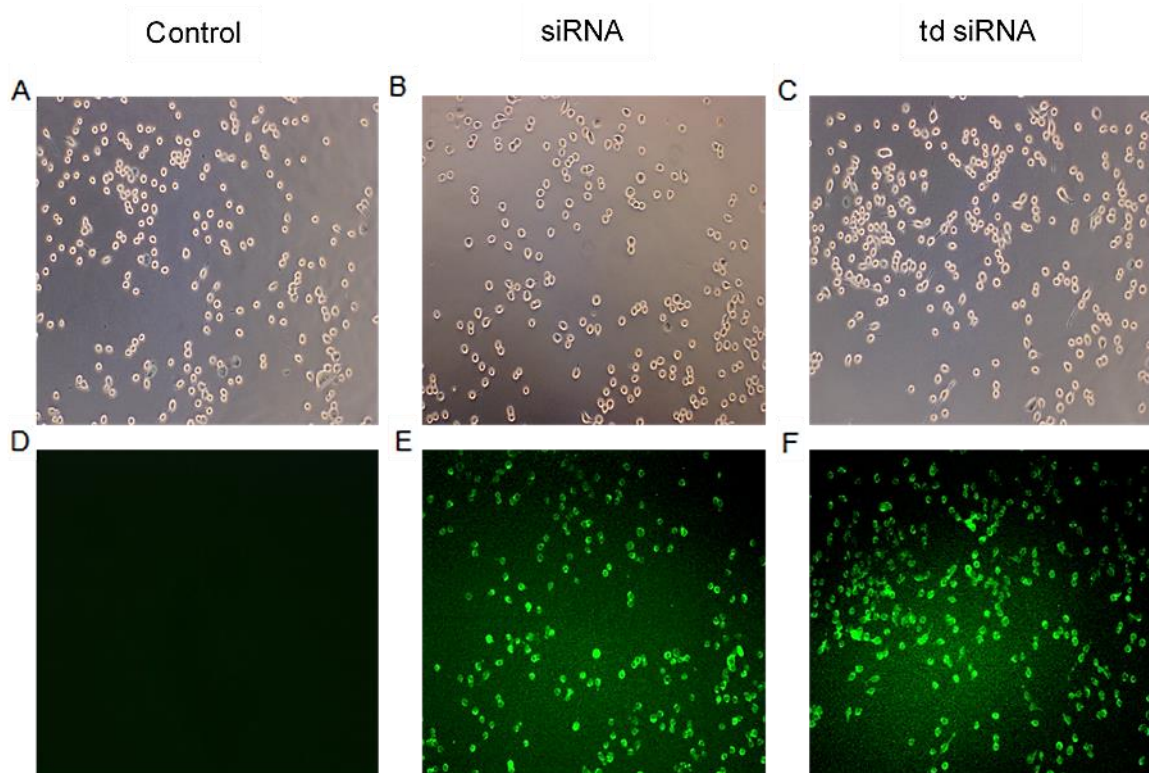

**Fig. S3.** Microscopy images for cellular uptake of treated cells. The fluorescein-labelled siRNA appears as green.



**Table S1.**

List of td RNA sequences.

| RNA      | Sequence                                          | Calculated | Observed                         |
|----------|---------------------------------------------------|------------|----------------------------------|
| td RNA 1 | 5'-GGCCUUUCACUACUCCUACUU-C <sub>18</sub> -D'9-3'  | 21226.97   | 10611.88<br>[M-2H] <sup>2-</sup> |
| td RNA 2 | 5'-GUAGGAGUAGUGAAAGGCCUU-C <sub>18</sub> -D'9-3'  | 22154.76   | 11077.62<br>[M-2H] <sup>2-</sup> |
| td RNA 3 | 5'-FGGCCUUUCACUACUCCUACUU-C <sub>18</sub> -D'9-3' | 22842.35   | 11406.64<br>[M-2H] <sup>2-</sup> |

\*F is fluorescein.

**Table S2.**

Sequences for DLS characterization.

| siRNA      | ON       | Sequence                                         | <i>D<sub>H</sub></i> (nm) |
|------------|----------|--------------------------------------------------|---------------------------|
| 1          | 1        | Sense strand                                     | 2.8 ± 0.6                 |
|            |          | 5'-GGCCUUUCACUACUCCUACUU-3'                      |                           |
|            | 2        | 3'-UCCGGAAAGUGAUGAGGAUG-5'                       |                           |
| td siRNA 1 | td RNA 1 | Antisense strand                                 | 6.9 ± 0.5                 |
|            |          | 5'-GGCCUUUCACUACUCCUACUU-C <sub>18</sub> -D'9-3' |                           |
|            | 2        | 3'-UCCGGAAAGUGAUGAGGAUG-5'                       |                           |

*D<sub>H</sub>* – Hydrodynamic diameter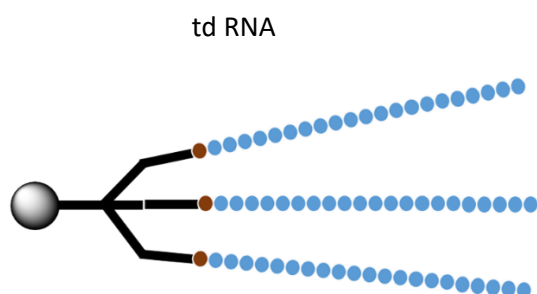

**Table S3**

Sequences of siRNAs and td siRNAs with melting temperature values.

| siRNA         | ON            | Sequence                                                           | $T_m$ (°C)     | $\Delta T_m$ (°C) |
|---------------|---------------|--------------------------------------------------------------------|----------------|-------------------|
| Control       | Buffer        | -                                                                  | -              | -                 |
| 1             |               | Sense strand                                                       |                |                   |
|               | 1             | 5'-GGCCUUUCACUACUCCUACUU-3'                                        | $77.6 \pm 0.2$ | -                 |
|               | 2             | 3'-UUCCGGAAAGUGAUGAGGAUG-5'                                        |                |                   |
|               |               | Antisense strand                                                   |                |                   |
| 2             | 1             | 5'-GGCCUUUCACUACUCCUACUU-3'                                        | $77.0 \pm 0.4$ | -0.7              |
|               | 3             | 3'- <b>11</b> CCGGAAAGUGAUGAGGAUG-5'                               |                |                   |
| 3             | 1             | 5'-GGCCUUUCACUACUCCUACUU-3'                                        | $77.1 \pm 0.3$ | -0.5              |
|               | 4             | 3'- <b>22</b> CCGGAAAGUGAUGAGGAUG-5'                               |                |                   |
| 4             | 1             | 5'-GGCCUUUCACUACUCCUACUU-3'                                        | $77.2 \pm 0.4$ | -0.4              |
|               | 5             | 3'- <b>33</b> CCGGAAAGUGAUGAGGAUG-5'                               |                |                   |
| td siRNA<br>2 | td RNA 1<br>3 | 5'-GGCCUUUCACUACUCCUACUU- <b>C<sub>18</sub>-D'<sub>9</sub></b> -3' | $77.0 \pm 0.2$ | -0.7              |
|               |               | 3'- <b>11</b> CCGGAAAGUGAUGAGGAUG-5'                               |                |                   |
| td siRNA<br>3 | td RNA 1<br>4 | 5'-GGCCUUUCACUACUCCUACUU- <b>C<sub>18</sub>-D'<sub>9</sub></b> -3' | $77.5 \pm 0.3$ | -0.2              |
|               |               | 3'- <b>22</b> CCGGAAAGUGAUGAGGAUG-5'                               |                |                   |
| td siRNA<br>4 | td RNA 1<br>5 | 5'-GGCCUUUCACUACUCCUACUU- <b>C<sub>18</sub>-D'<sub>9</sub></b> -3' | $77.5 \pm 0.3$ | -0.1              |
|               |               | 3'- <b>33</b> CCGGAAAGUGAUGAGGAUG-5'                               |                |                   |

**Table S4**

RNAi activity for modified td siRNAs with sense strand as branching unit.

| siRNA      | Sequence                                                                        | Upper: 10 nM<br>Lower: 1 nM |
|------------|---------------------------------------------------------------------------------|-----------------------------|
| Control    | (buffer)                                                                        | 100 ± 9.3                   |
| siRNA 1    | Sense strand                                                                    |                             |
|            | 5'-GGCCUUUCACUACUCCUACUU-3'<br>3'-UCCGGAAAGUGAUGAGGAUG-5'                       | 21.9 ± 1.4<br>31.5 ± 4.5    |
|            | Antisense strand                                                                |                             |
| td siRNA 1 | 5'-GGCCUUUCACUACUCCUACUU-C <sub>18</sub> -D'9-3'<br>3'-UCCGGAAAGUGAUGAGGAUG-5'  | 19.4 ± 1.0<br>38.7 ± 1.8    |
| td siRNA 2 | 5'-GGCCUUUCACUACUCCUACUU-C <sub>18</sub> -D'9-3'<br>3'-11CCGGAAAGUGAUGAGGAUG-5' | 22.1 ± 1.1<br>42.9 ± 4.2    |
| td siRNA 3 | 5'-GGCCUUUCACUACUCCUACUU-C <sub>18</sub> -D'9-3'<br>3'-22CCGGAAAGUGAUGAGGAUG-5' | 22.0 ± 2.2<br>38.9 ± 2.6    |
| td siRNA 4 | 5'-GGCCUUUCACUACUCCUACUU-C <sub>18</sub> -D'9-3'<br>3'-33CCGGAAAGUGAUGAGGAUG-5' | 22.1 ± 2.0<br>46.0 ± 3.3    |

Gene expression from cells transfected with each siRNA has been normalized and presented as the percentage from three independent experiments, with three replicate samples per experiment.

**Table S5**

RNAi activity for modified td siRNAs with antisense strand as branching unit.

| siRNA      | Sequence                                                                                       | Upper: 10 nM<br>Lower: 1 nM |
|------------|------------------------------------------------------------------------------------------------|-----------------------------|
| Control    | (buffer)                                                                                       | 100 ± 9.3                   |
| siRNA 1    | Sense strand<br>5'-GGCCUUUCACUACUCCUACUU-3'<br>3'-UUCCGGAAAGUGAUGAGGAUG-5'<br>Antisense strand | 19.9 ± 1.4<br>31.5 ± 4.5    |
| td siRNA 5 | 5'-GGCCUUUCACUACUCCUACUU-3'<br>3'-D <sup>9</sup> -C <sub>18</sub> -UUCCGGAAAGUGAUGAGGAUG-5'    | 42.1 ± 4.4<br>76.3 ± 5.0    |
| td siRNA 6 | 5'-GGCCUUUCACUACUCCUAC11-3'<br>3'-D <sup>9</sup> -C <sub>18</sub> -UUCCGGAAAGUGAUGAGGAUG-5'    | 33.9 ± 1.5<br>70.1 ± 4.0    |
| td siRNA 7 | 5'-GGCCUUUCACUACUCCUAC22-3'<br>3'-D <sup>9</sup> -C <sub>18</sub> -UUCCGGAAAGUGAUGAGGAUG-5'    | 30.7 ± 4.7<br>59.1 ± 3.2    |
| td siRNA 8 | 5'-GGCCUUUCACUACUCCUAC33-3'<br>3'-D <sup>9</sup> -C <sub>18</sub> -UUCCGGAAAGUGAUGAGGAUG-5'    | 28.0 ± 3.3<br>71.0 ± 5.1    |

Gene expression from cells transfected with each siRNA has been normalized and presented as the percentage from three independent experiments, with three replicate samples per experiment.

# <sup>1</sup>H and <sup>13</sup>C NMR spectra of compounds

## <sup>1</sup>H NMR spectrum of compound D2

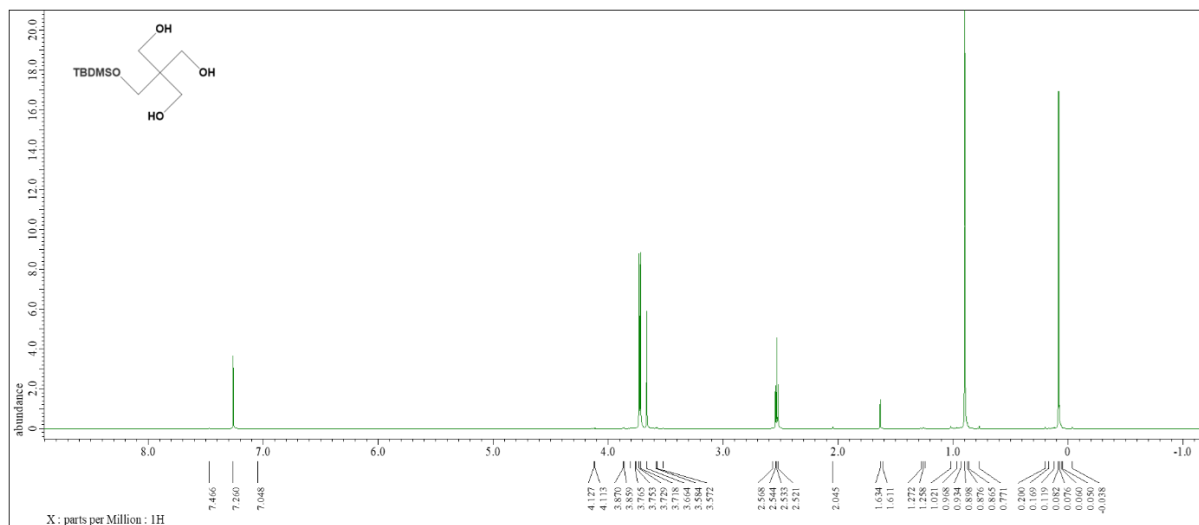

## <sup>13</sup>C NMR spectrum of compound D2

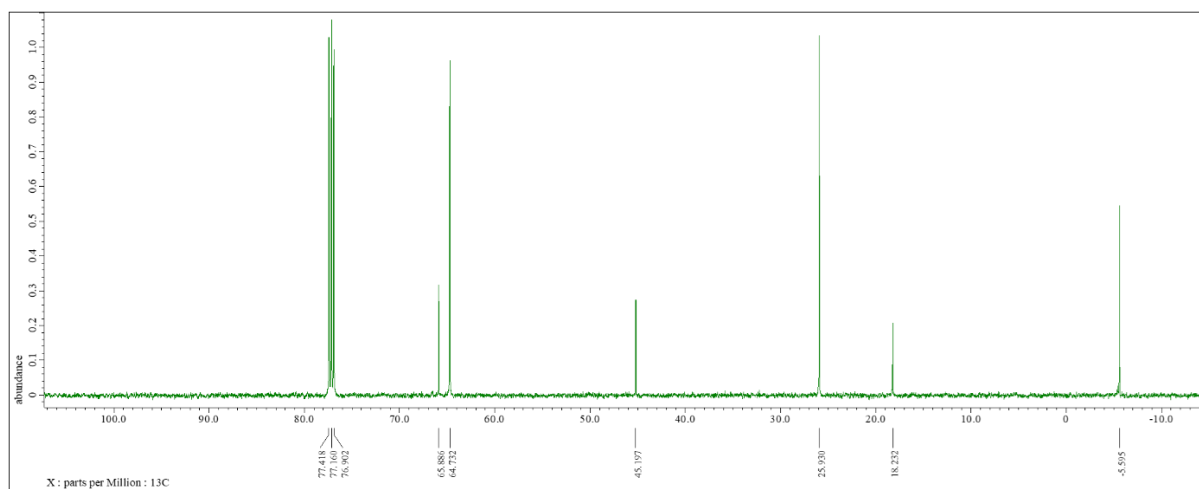

### <sup>1</sup>H NMR spectrum of compound D3

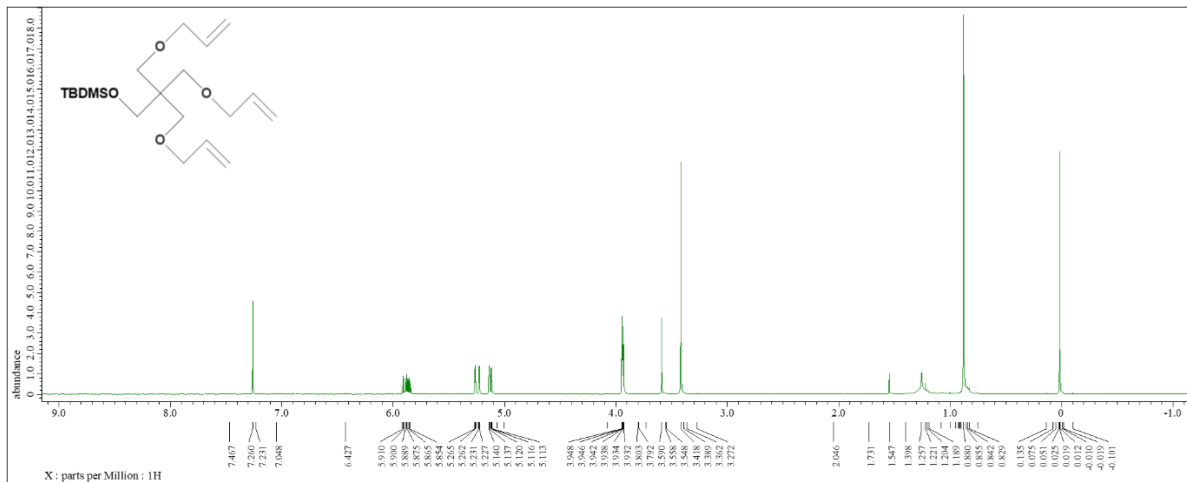

### <sup>13</sup>C NMR spectrum of compound D3

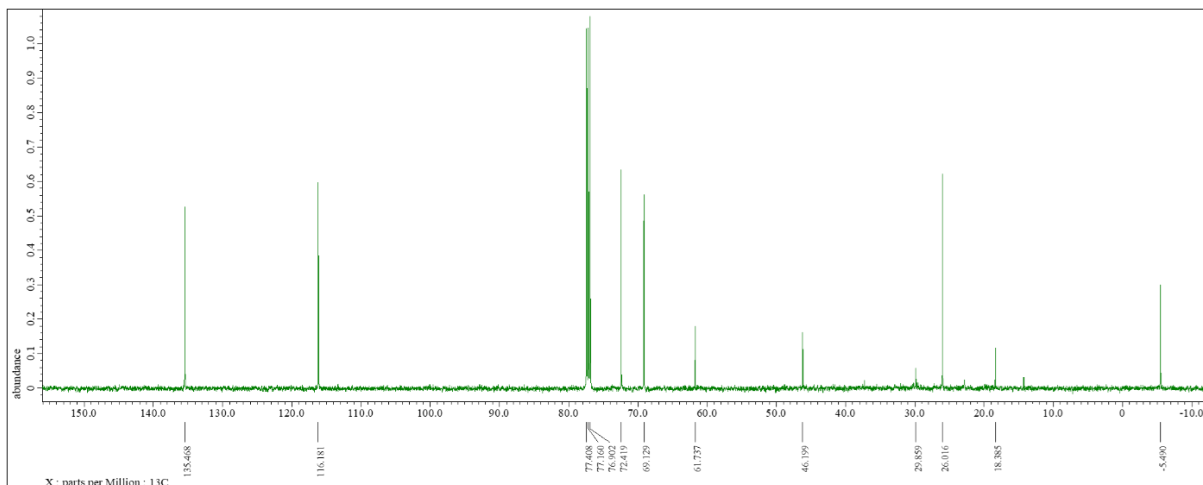

# <sup>1</sup>H NMR spectrum of compound D4

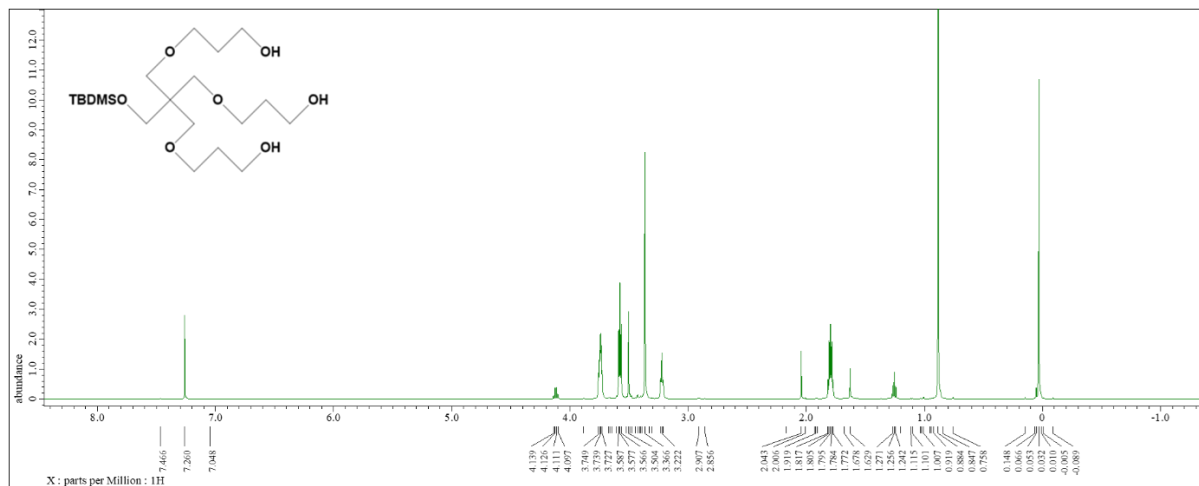

# <sup>13</sup>C NMR spectrum of compound D4

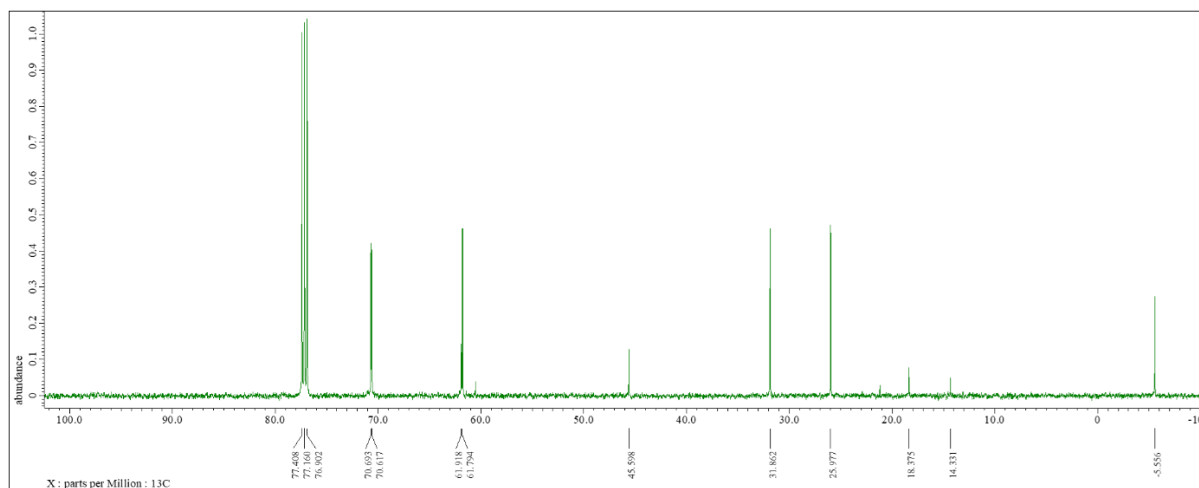

### <sup>1</sup>H NMR spectrum of compound D5

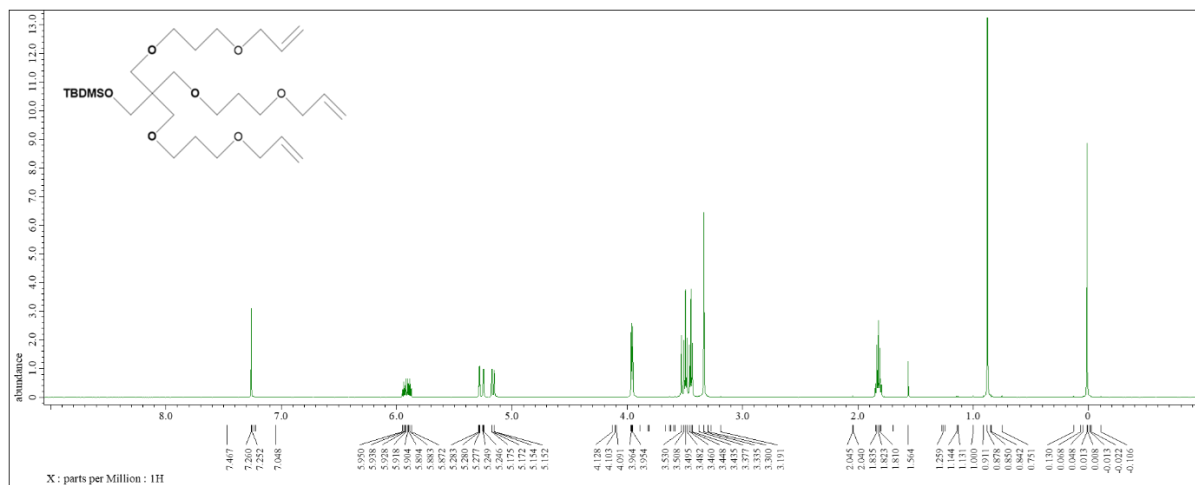

### <sup>13</sup>C NMR spectrum of compound D5

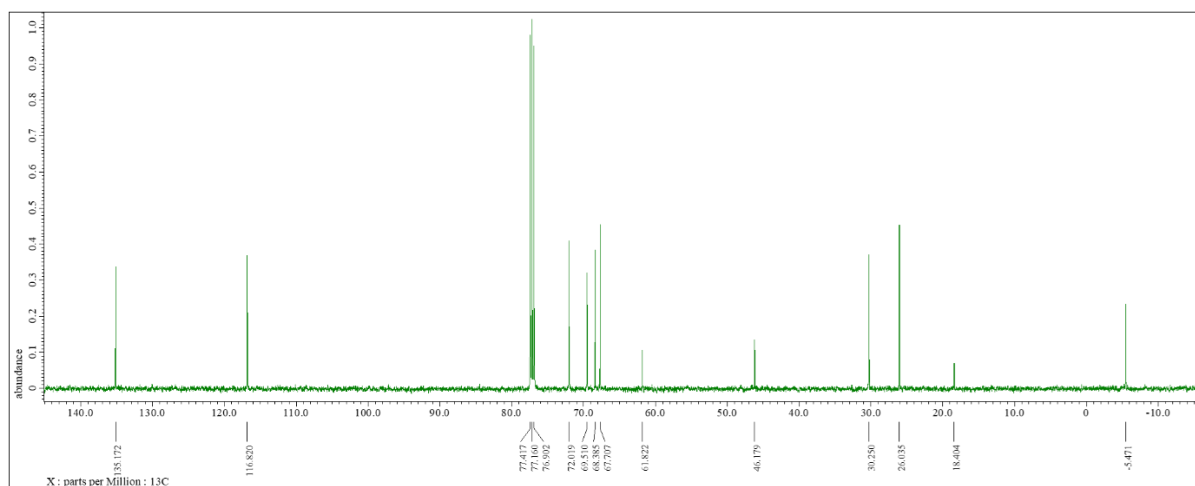



### <sup>1</sup>H NMR spectrum of compound D6

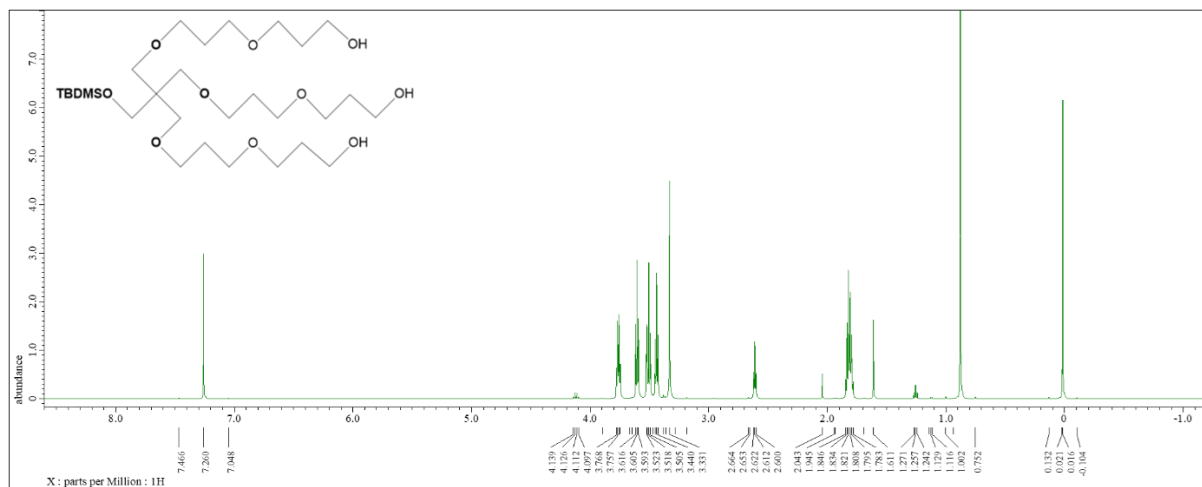

### <sup>13</sup>C NMR spectrum of compound D6

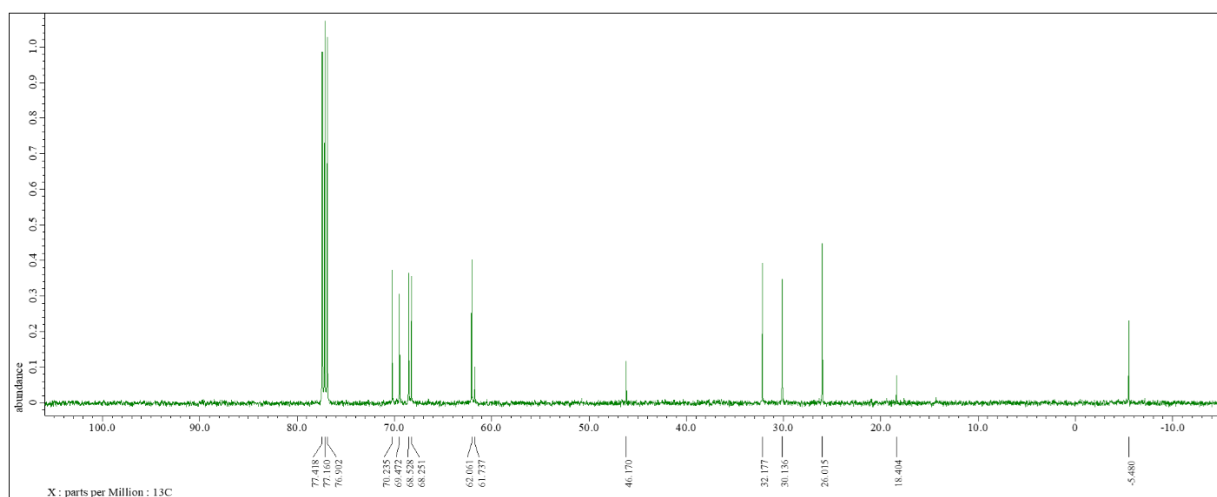

### <sup>1</sup>H NMR spectrum of compound D7

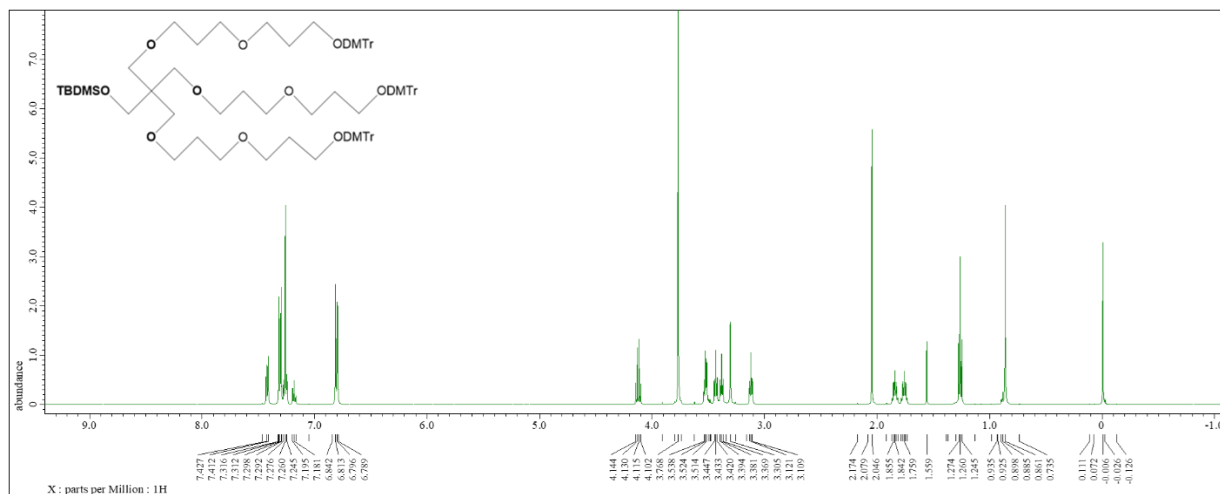

### <sup>13</sup>C NMR spectrum of compound D7

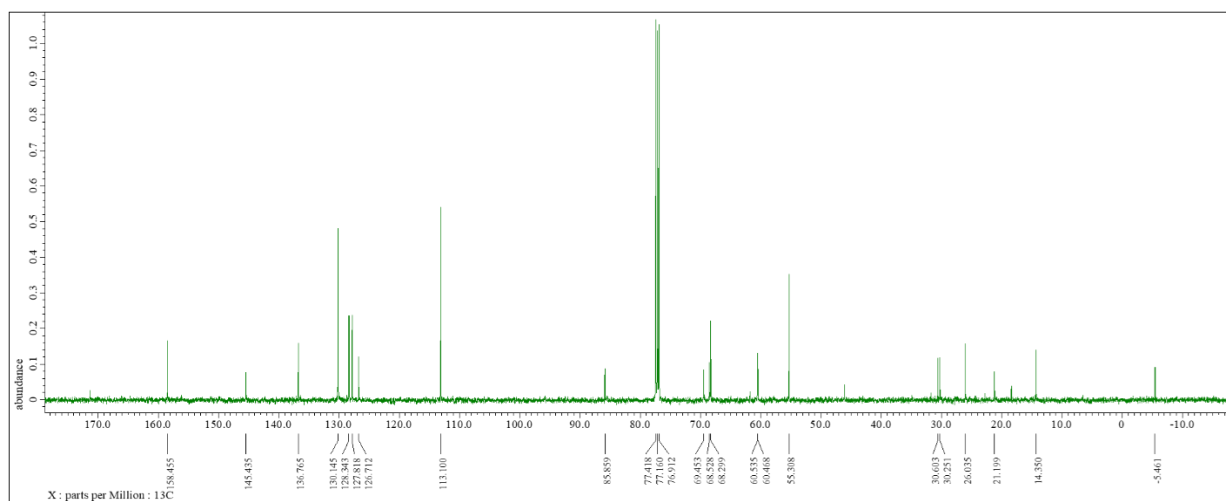

Supplement: c9ra08071f1.pdf [file c9ra08071f1.pdf]
